# Supplementary material for: Changes in the free amino acid composition of Capsicum annuum (pepper) leaves in response to Myzus persicae (green peach aphid) infestation. A comparison with water stress
Source: PubMed Central journal article supplement (PMC5983507; doi:10.1371/journal.pone.0198093), 2018-06-01
Supplement: pone.0198093.s001.pdf [file pone.0198093.s001.pdf]

**S1 Table. Triple quadrupole MRM acquisition method parameters.**

| <b>Compound name</b> | <b>Retention time (min)</b> | <b>Precursor ion (m/z)</b> | <b>Product ion (m/z)</b> | <b>Fragmentor (V)</b> | <b>CE (V)</b> |
|----------------------|-----------------------------|----------------------------|--------------------------|-----------------------|---------------|
| Alanine              | 0.521                       | 90,09                      | <b>44,05</b>             | 380                   | 10            |
|                      |                             |                            | 42                       | 380                   | 10            |
| Arginine             | 1.538                       | 175,2                      | <b>70</b>                | 380                   | 16            |
|                      |                             |                            | 60,06                    | 380                   | 25            |
| Asparagine           | 0.424                       | 133,1                      | 87,1                     | 380                   | 4             |
|                      |                             |                            | <b>74,1</b>              | 380                   | 10            |
| Aspartate            | 0.442                       | 134,1                      | 88                       | 380                   | 5             |
|                      |                             |                            | <b>74</b>                | 380                   | 10            |
| Cysteine             | 0.509                       | 122                        | 76                       | 380                   | 25            |
|                      |                             |                            | <b>59</b>                | 380                   | 25            |
| Cystine              | 0.484                       | 241                        | <b>151,9</b>             | 380                   | 4             |
|                      |                             |                            | 195                      | 380                   | 4             |
| Glycine              | 0.447                       | 76,07                      | 51,7                     | 380                   | 4             |
|                      |                             |                            | <b>29,9</b>              | 380                   | 30            |
| Glutamate            | 0.8                         | 148,1                      | 130,1                    | 380                   | 4             |
|                      |                             |                            | <b>84,1</b>              | 380                   | 15            |
| Glutamine            | 0.450                       | 147,1                      | 130,1                    | 380                   | 15            |
|                      |                             |                            | <b>84,1</b>              | 380                   | 5             |
| Hydroxyproline       | 0.434                       | 132                        | <b>85,9</b>              | 380                   | 4             |
|                      |                             |                            | 68                       | 380                   | 4             |
| Histidine            | 0.822                       | 156,1                      | <b>109,9</b>             | 380                   | 25            |
|                      |                             |                            | 93,04                    | 380                   | 25            |
| Isoleucine           | 4.224                       | 132,2                      | <b>69,1</b>              | 380                   | 4             |
|                      |                             |                            | 56,9                     | 380                   | 20            |
| Leucine              | 4.289                       | 132,2                      | <b>86,1</b>              | 380                   | 4             |
|                      |                             |                            | 54,9                     | 380                   | 20            |
| Lysine               | 0.9                         | 146,9                      | 130,08                   | 380                   | 25            |
|                      |                             |                            | <b>83,9</b>              | 380                   | 25            |
| Methionine           | 2.5                         | 150,2                      | 104,05                   | 380                   | 25            |
|                      |                             |                            | <b>56,05</b>             | 380                   | 25            |
| Phenylalanine        | 4.5                         | 166,2                      | <b>119,9</b>             | 380                   | 25            |
|                      |                             |                            | 103,06                   | 380                   | 25            |
| Proline              | 0.641                       | 116,1                      | <b>70</b>                | 380                   | 25            |
|                      |                             |                            | 68,05                    | 380                   | 25            |
| Serine               | 0.436                       | 106,1                      | 88,04                    | 380                   | 15            |
|                      |                             |                            | <b>60,05</b>             | 380                   | 25            |
| Threonine            | 0.491                       | 120,1                      | 74,01                    | 380                   | 20            |
|                      |                             |                            | <b>56,01</b>             | 380                   | 20            |
| Tryptophan           | 4.843                       | 205,2                      | <b>188</b>               | 380                   | 4             |
|                      |                             |                            | 146                      | 380                   | 16            |
| Tyrosine             | 4.089                       | 182                        | <b>136</b>               | 380                   | 10            |
|                      |                             |                            | 91                       | 380                   | 20            |
| Valine               | 2.110                       | 118,1                      | 72                       | 380                   | 25            |
|                      |                             |                            | <b>55,06</b>             | 380                   | 25            |

Quantifier transitions are marked in bold.
