# Supplementary material for: Changes in the free amino acid composition of Capsicum annuum (pepper) leaves in response to Myzus persicae (green peach aphid) infestation. A comparison with water stress
Source: PubMed Central journal article supplement (PMC5983507; doi:10.1371/journal.pone.0198093), 2018-06-01
Supplement: pone.0198093.s002.pdf [file pone.0198093.s002.pdf]

**S2 Table. Contribution (%) by dimension of each amino acid in FAMD by time and density of aphid infestation.**

|                | <b>Dim.1</b> | <b>Dim.2</b> | <b>Dim.3</b> | <b>Dim.4</b> | <b>Dim.5</b> |
|----------------|--------------|--------------|--------------|--------------|--------------|
| Alanine        | 6.131        | 0.400        | 0.289        | 0.309        | 0.031        |
| Arginine       | 6.195        | 0.560        | 0.106        | 0.07         | 0.002        |
| Asparagine     | 5.873        | 0.767        | 0.107        | 0.843        | 0.465        |
| Aspartate      | 0.061        | 4.832        | 35.390       | 0.999        | 1.595        |
| Glutamate      | 2.178        | 22.200       | 0.038        | 0.544        | 0.129        |
| Glutamine      | 4.206        | 9.252        | 0.096        | 0.246        | 2.574        |
| Hydroxyproline | 3.289        | 3.199        | 8.876        | 0.130        | 7.265        |
| Histidine      | 4.953        | 0.139        | 4.063        | 2.611        | 0.348        |
| Isoleucine     | 6.164        | 0.696        | 0.076        | 0.030        | 0.077        |
| Leucine        | 6.142        | 0.988        | 0.037        | 0.010        | 0.014        |
| Lysine         | 6.186        | 0.600        | 0.008        | 0.006        | 0.001        |
| Methionine     | 5.939        | 0.692        | 0.344        | 0.043        | 0.123        |
| Phenylalanine  | 6.215        | 0.487        | 0.158        | 0.001        | 0.008        |
| Proline        | 2.889        | 12.904       | 2.965        | 2.135        | 0.229        |
| Serine         | 3.387        | 11.832       | 0.023        | 6.011        | 0.011        |
| Threonine      | 6.244        | 0.017        | 0.275        | 0.096        | 0.229        |
| Tryptophan     | 5.823        | 0.320        | 1.146        | 0.618        | 0.012        |
| Tyrosine       | 6.144        | 0.829        | 0.138        | 0.002        | 0.033        |
| Valine         | 6.246        | 0.398        | 0.098        | 0.038        | 0.002        |
| Density        | 4.707        | 1.053        | 2.150        | 0.012        | 1.718        |
| Time           | 1.028        | 27.874       | 43.617       | 85.245       | 85.133       |

{Density Levels = High and low aphid densities;  
Time levels = 3hpi, 8hpi, 1dpi, 2dpi, 4dpi and 7dpi}
