# Supplementary material for: Changes in the free amino acid composition of Capsicum annuum (pepper) leaves in response to Myzus persicae (green peach aphid) infestation. A comparison with water stress
Source: PubMed Central journal article supplement (PMC5983507; doi:10.1371/journal.pone.0198093), 2018-06-01
Supplement: pone.0198093.s003.pdf [file pone.0198093.s003.pdf]

**S3 Table. Contribution (%) by dimension of each amino acid In FAMD by treatment.**

|                | <b>Dim.1</b> | <b>Dim.2</b> | <b>Dim.3</b> | <b>Dim.4</b> | <b>Dim.5</b> |
|----------------|--------------|--------------|--------------|--------------|--------------|
| Alanine        | 4.906        | 4.109        | 0.444        | 1.141        | 28.944       |
| Arginine       | 5.848        | 0.0625       | 0.045        | 0.178        | 3.120        |
| Asparagine     | 0.455        | 23.923       | 0.213        | 1.147        | 1.172        |
| Aspartate      | 4.243        | 6.741        | 19.228       | 2.278        | 0.226        |
| Glutamate      | 4.180        | 6.598        | 68.296       | 4.035        | 1.918        |
| Glutamine      | 2.530        | 14.561       | 5.542        | 9.173        | 13.346       |
| Hydroxyproline | 5.676        | 0.843        | 0.272        | 0.096        | 0.344        |
| Histidine      | 5.821        | 0.173        | 0.378        | 1.354        | 0.324        |
| Isoleucine     | 5.855        | 0.007        | 0.239        | 1.470        | 4.949        |
| Leucine        | 5.811        | 0.245        | 0.010        | 0.354        | 0.051        |
| Lysine         | 5.711        | 0.592        | 3.764        | 1.202        | 3.852        |
| Methionine     | 5.690        | 0.699        | 0.015        | 1.947        | 4.911        |
| Phenylalanine  | 5.863        | 0.005        | 0.318        | 0.144        | 2.403        |
| Proline        | 5.634        | 0.971        | 0.168        | 1.334        | 9.059        |
| Serine         | 2.897        | 13.041       | 0.151        | 5.476        | 10.593       |
| Threonine      | 5.664        | 0.756        | 0.075        | 10.061       | 5.890        |
| Tryptophan     | 5.801        | 0.288        | 0.022        | 0.00002      | 0.754        |
| Tyrosine       | 5.692        | 7.152        | 0.247        | 2.091        | 0.507        |
| Valine         | 5.863        | 5.332        | 0.002        | 1.363        | 0.916        |
| Treatment      | 5.859        | 2.567        | 0.570        | 3.410        | 6.721        |

{Treatment levels = High aphid density, low aphid density, and water constraint}
